# Supplementary material for: Quality Improvement of Green Saba Banana Flour Steamed Cake
Source: MDPI journal article supplement (doi:10.3390/app13042421), 2023-02-13
Supplement: s1 [file s1]

**Table S1.** The plan for arranging GSBF cakes for Ranking Test generated by Balanced Incomplete Block (BIB) Design.

| Block | Formulation* |    |    |    |
|-------|--------------|----|----|----|
| 1     | F1           | F2 | F3 | F4 |
| 2     | F5           | F6 | F7 | F8 |
| 3     | F1           | F2 | F7 | F8 |
| 4     | F3           | F4 | F5 | F6 |
| 5     | F1           | F3 | F6 | F8 |
| 6     | F2           | F4 | F5 | F7 |
| 7     | F1           | F4 | F6 | F7 |
| 8     | F2           | F3 | F5 | F8 |
| 9     | F1           | F2 | F5 | F6 |
| 10    | F3           | F4 | F7 | F8 |
| 11    | F1           | F3 | F5 | F7 |
| 12    | F2           | F4 | F6 | F8 |
| 13    | F1           | F4 | F5 | F8 |
| 14    | F2           | F3 | F6 | F7 |

Adopted from Cochran & Cox [7], whereby  $t = 8$ ;

$k = 4$ ;  $r = 7$ ;  $b = 14$ ;  $\lambda = 3$

\*F1 = O0P10; F2 = O0P15; F3 = O35P0; F4 = O35P10;

F5 = O35P15; F6 = O7P0; F7 = O7P10; F8 = O7P15

where:

$t$  = number of formulation

$k$  = number of formulation in a block

$r$  = number of replicates for each formulation

$b$  = number of block

$\lambda$  = number of pair treatments occur in a block

A Balanced Incomplete Block (BIB) Design is a plan where all pairs of treatments occur together within a block an equal number of times ( $\lambda$ ). In Ranking Test, the blocks were triplicated to produce a total of 42 experimental runs (sensory panelists).

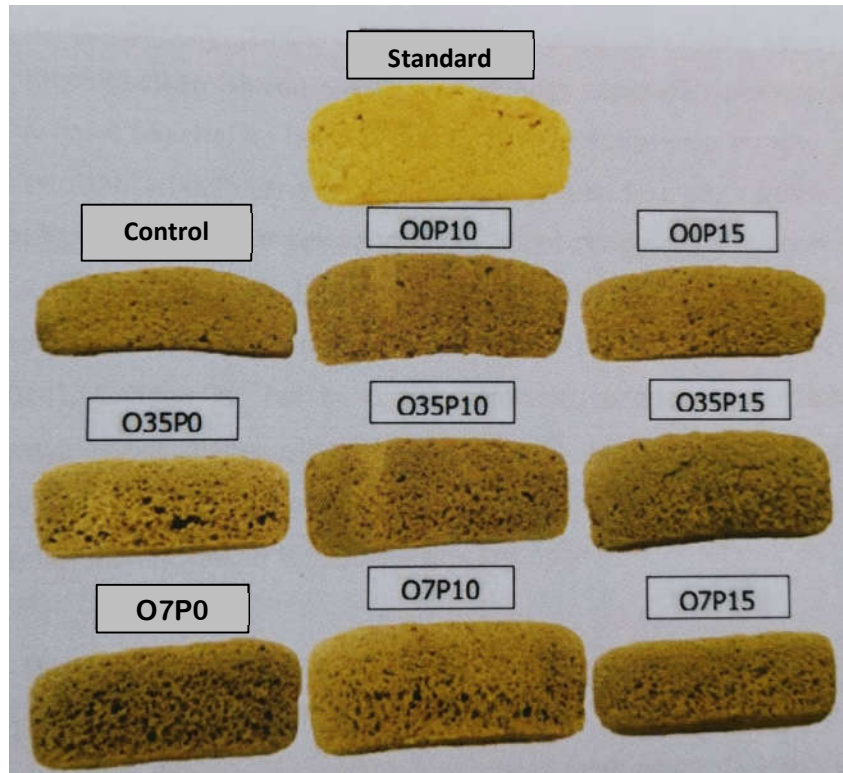

**Figure S1.** Cross sectional view of standard (100% wheat flour), control (100% GSBF) and other GSBF cakes supplemented with different levels of soy protein isolate (SPI) and Ovalette.
