# Supplementary material for: Quality Improvement of Green Saba Banana Flour Steamed Cake
Source: MDPI journal article supplement (doi:10.3390/app13042421), 2023-02-13
Supplement: s1 [file s1]

Archive with 1 entries (1 files):
- applsci-2042850-supplementary.pdf
